# Supplementary material
Source: HighWire-hosted journal article supplement (https://www.rcpjournals.org/highwire/filestream/7156/field_highwire_adjunct_files/0/CMJv15n2-Supplementary_material_Watkin.pdf)
Supplement: CMJv15n2-Supplementary_material_Watkin.pdf [file CMJv15n2-Supplementary_material_Watkin.pdf]

## Supplementary material

### Appendix 1: Day-of-Care criteria (only one criterion has to be met to define 'appropriate' for acute care).

#### Severity of illness

- 1 Acute or ongoing deterioration in conscious level
- 2 Acute or ongoing new confusion
- 3 Acute neurological deficit, including stroke within 72 hours
- 4 Acute coronary syndrome confirmed or suspected
- 5 Acute dysrhythmia with haemodynamic disturbance
- 6 Pulse rate <50 or >100 bpm
- 7 BP systolic <90 mmHg
- 8 Phase IV hypertension
- 9 Active bleeding
- 10 Transfusion due to blood loss
- 11 Temperature <35°C or >38°C
- 12 Arterial pH <7.3 or pH >7.45
- 13 Na <123 or >150 mmol/l
- 14 K <2.5 or >6.0 mmol/l
- 15 Acute kidney injury
- 16 Post-operative ileus

#### Service intensity that requires access to acute hospital inpatient facilities

- |    |                 |                                                                                                                                                                                                     |
|----|-----------------|-----------------------------------------------------------------------------------------------------------------------------------------------------------------------------------------------------|
| 17 | Therapy         | Requires IV, IM or subcutaneous medication (that cannot be delivered at home/in the community)                                                                                                      |
| 18 | Therapy         | Receiving treatment or new/experimental treatment requiring frequent dose adjustments or medical monitoring under direct medical supervision                                                        |
| 19 | Procedure       | Surgical procedure today that is not suitable for day case                                                                                                                                          |
| 20 | Procedure       | Invasive procedure not suitable for day case (eg some interventional radiology, some guided biopsies etc)                                                                                           |
| 21 | Monitoring      | Vital sign monitoring every hour or more frequently                                                                                                                                                 |
| 22 | Monitoring      | Chemotherapy requiring constant supervision                                                                                                                                                         |
| 23 | Monitoring      | Requires accurate input/output fluid balance measurement                                                                                                                                            |
| 24 | Respiratory     | Requires continuous oxygen, non-invasive ventilation or intensive nebuliser therapy that cannot be delivered at home                                                                                |
| 25 | Fluid/nutrition | To establish complex nutritional support, including enteral feeding                                                                                                                                 |
| 26 | Fluid/nutrition | Requires intravenous fluids (that cannot be delivered at home/in the community)                                                                                                                     |
| 27 | Recovery        | Immediate postoperative recovery phase from therapy/procedure covered in 19 and 20 (above), including need for complex dressings/wound drainage (that cannot be delivered in the community/at home) |
| 28 | Investigation   | Requires multiple investigations for urgent diagnosis                                                                                                                                               |
